# Supplementary material for: Transparent and double sided hydrophobic functionalization of cotton fabric by surfactant-assisted admicellar polymerization of fluoromonomers
Source: Royal Society of Chemistry journal article supplement (doi:10.1039/c8nj00019k), 2018-01-01
Supplement: c8nj00019k1.pdf [file c8nj00019k1.pdf]

Supplementary Material S1

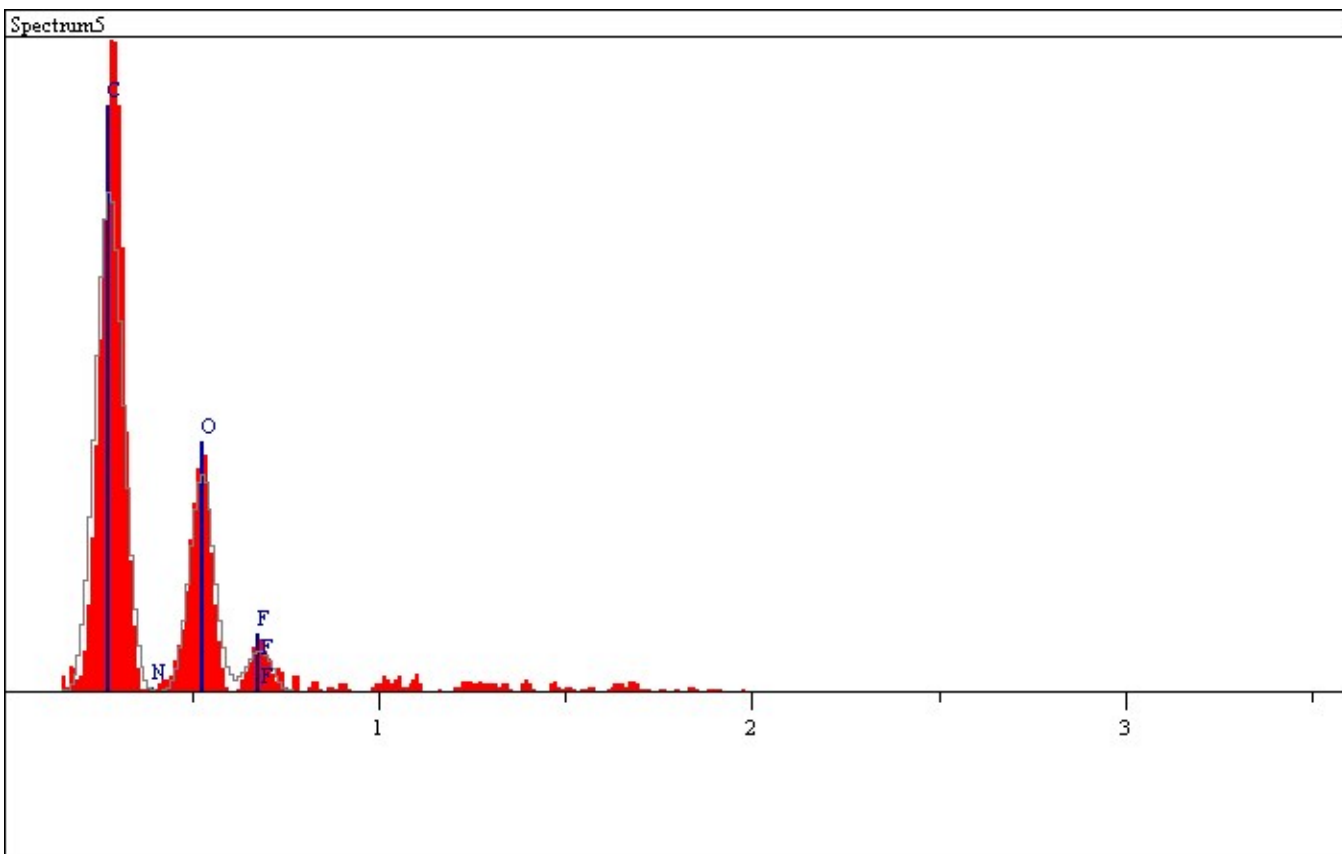

| Elt. | Line | Intensity (c/s) | Error 2-sig | Atomic % | Conc    | Units |       |
|------|------|-----------------|-------------|----------|---------|-------|-------|
| C    | Ka   | 8.60            | 0.415       | 56.270   | 48.369  | wt.%  |       |
| N    | Ka   | 0.00            | 0.000       | 0.000    | 0.000   | wt.%  |       |
| O    | Ka   | 3.50            | 0.265       | 36.463   | 41.752  | wt.%  |       |
| F    | Ka   | 0.69            | 0.118       | 8.667    | 9.880   | wt.%  |       |
|      |      |                 |             | 100.000  | 100.000 | wt.%  | Total |

kV 2.0  
Takeoff Angle 35.0°  
Elapsed Livetime 200.0

EDX of fluoropolymer modified cotton fabric
